# Supplementary material for: Comparison of Heart Team vs Interventional Cardiologist Recommendations for the Treatment of Patients With Multivessel Coronary Artery Disease
Source: PubMed Central journal article supplement (PMC7417969; doi:10.1001/jamanetworkopen.2020.12749), 2020-08-10
Supplement: jamanetwopen-3-e2012749-s001.pdf [file jamanetwopen-3-e2012749-s001.pdf]

## Supplementary Online Content

Tsang MB, Schwalm JD, Gandhi S, et al. Comparison of heart team vs interventional cardiologist recommendations for the treatment of patients with multivessel coronary artery disease. *JAMA Netw Open*. 2020;3(8):e2012749. doi:10.1001/jamanetworkopen.2020.12749

**eMethods.** Structured Template of Virtual Heart Team Case Presentation

This supplementary material has been provided by the authors to give readers additional information about their work.

**eMethods.** Structured Template of Virtual Heart Team Case Presentation

**Case Template**

| Age                                       | BMI | Gender | Patient Type | Inpatient vs Outpatient |
|-------------------------------------------|-----|--------|--------------|-------------------------|
| <b>Indication for Procedure</b>           |     |        |              |                         |
| <b>Rest ECG: Ischemic Changes at rest</b> |     |        |              |                         |
| <b>Exercise ECG</b>                       |     |        |              |                         |
| <b>Functional Imaging</b>                 |     |        |              |                         |

**Catheterization Date:**

**Clinical History** (including clinical course, electrocardiogram changes and troponin rise as relevant):

**Electrocardiogram:**

**Echocardiogram:**

**Stress Test/ Perfusion Imaging:**

**Risk Factors:**

**Past Medical History / Co-morbidities:**

**Medications on Presentation to Heart Investigation Unit:**

**Allergies:**

**Social History:**

|                                                                                                                      |  |
|----------------------------------------------------------------------------------------------------------------------|--|
| <b>Social Situation:</b> (living situation, social supports, marital status, complexities with spouse or dependents) |  |
| <b>Occupation:</b>                                                                                                   |  |
| <b>Drug Coverage:</b>                                                                                                |  |
| <b>Functional Status</b> (independence with activities of daily living, mobility)                                    |  |

**Physical Examination:**

**Relevant Blood Work:**

|                   |  |
|-------------------|--|
| <b>Hemoglobin</b> |  |
| <b>INR</b>        |  |
| <b>Platelets</b>  |  |
| <b>Potassium</b>  |  |
| <b>Sodium</b>     |  |
| <b>Creatinine</b> |  |

**Cardiac Catheterization**

**Aortic Pressure:**

**Left Ventricular Pressure:**

**Left Ventricular End Diastolic Pressure:**

**Left Ventricular Angiogram** (Function, wall motion abnormalities, mitral regurgitation, Pull back gradients across aortic valve):

**LEFT MAIN:**

**LEFT ANTERIOR DESCENDING:**

**RAMUS:**

**LEFT CIRCUMFLEX:**

**RIGHT CORONARY ARTERY:**

|                     |                                          |
|---------------------|------------------------------------------|
| <b>Euroscore</b>    | % mortality                              |
| <b>STS Score</b>    | % mortality<br>% morbidity and mortality |
| <b>Syntax Score</b> |                                          |
